# Supplementary material for: Pan-Cancer Analysis of the Roles and Driving Forces of RAB42
Source: MDPI journal article supplement (doi:10.3390/biom13010043), 2022-12-26
Supplement: s1 [file s1]

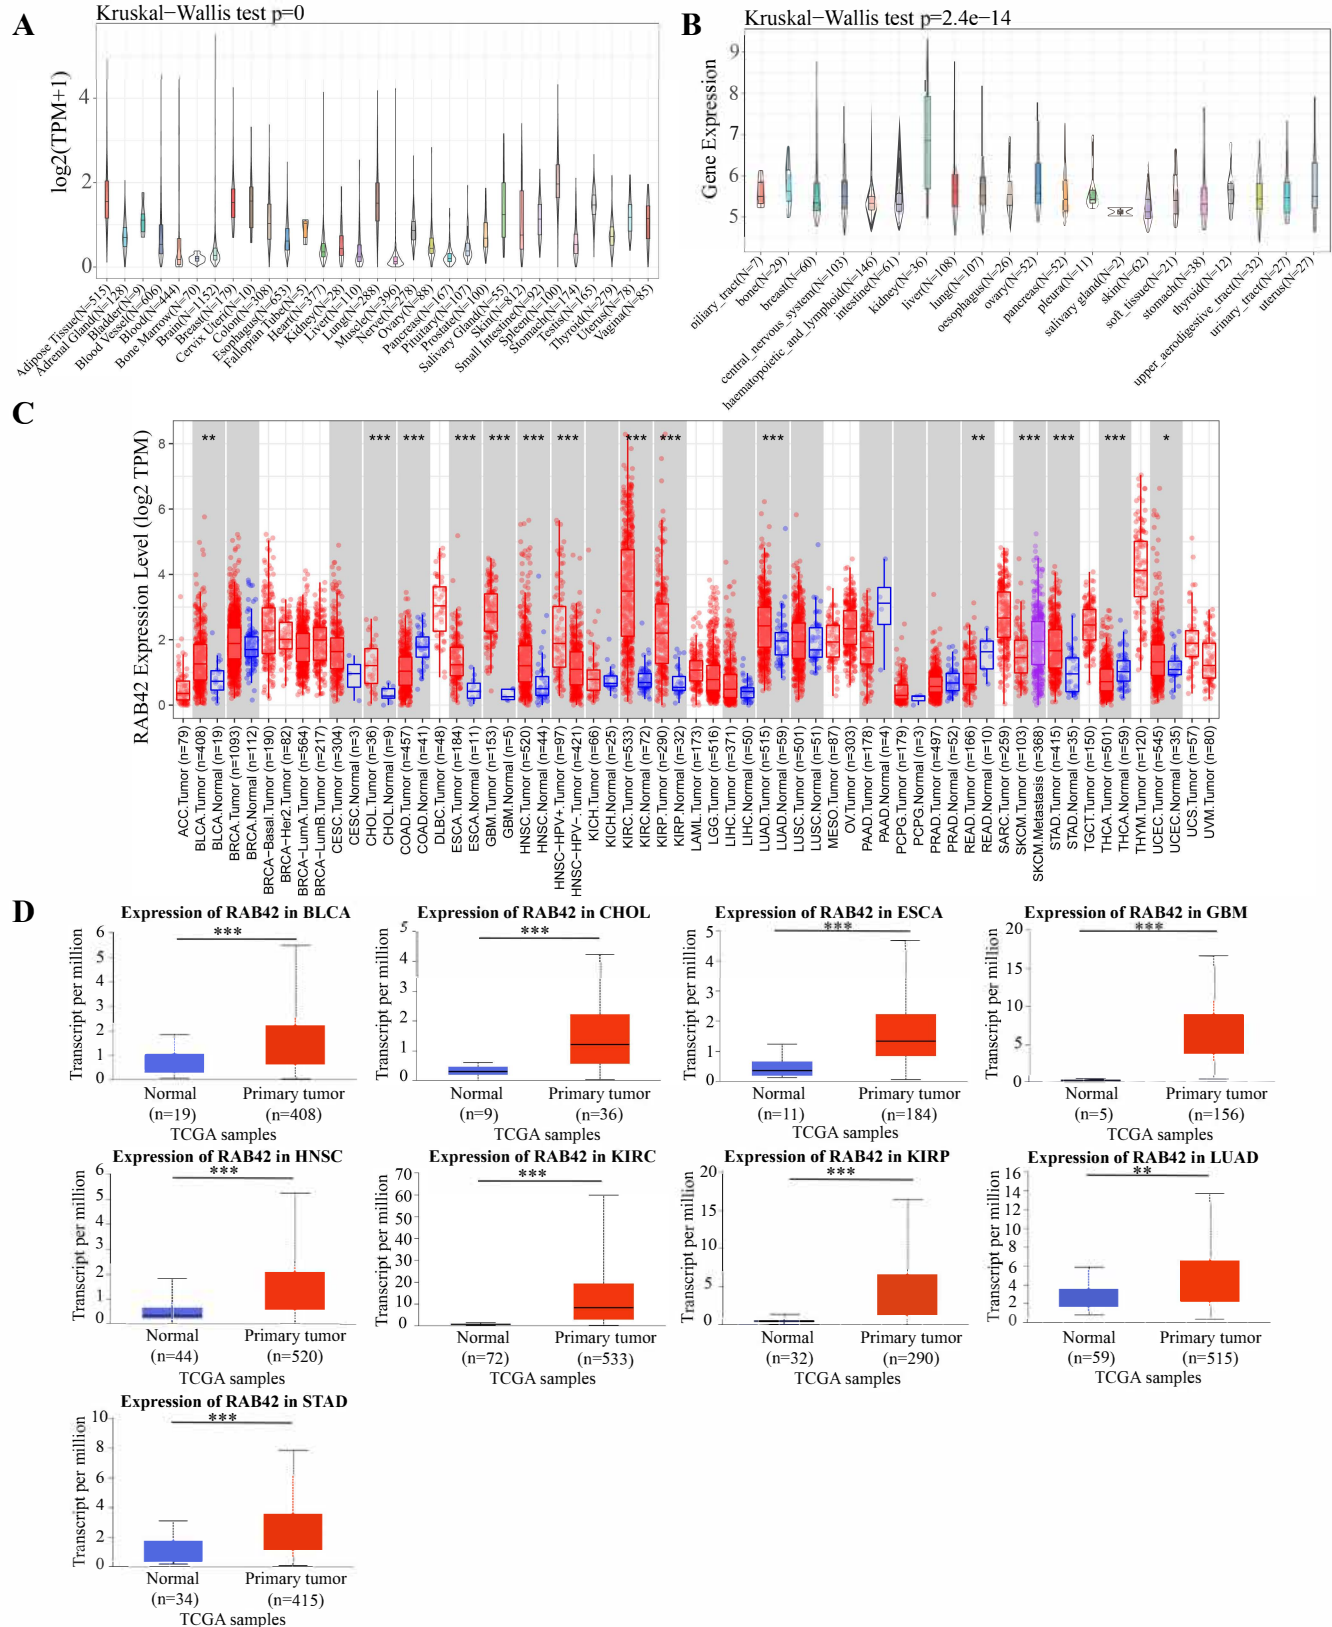

Supplementary Figure S1: Expression analysis of RAB42 in pan-cancer. The expression levels of RAB42 in normal tissues (A), cancer cell lines (B) using SangerBox database. (C) RAB42 expression in different cancers using TIMER2.0 database. (D) RAB42 expression in 9 tumor types using UALCAN database. \* $P < 0.05$ , \*\* $P < 0.01$ , \*\*\* $P < 0.001$ .

**A**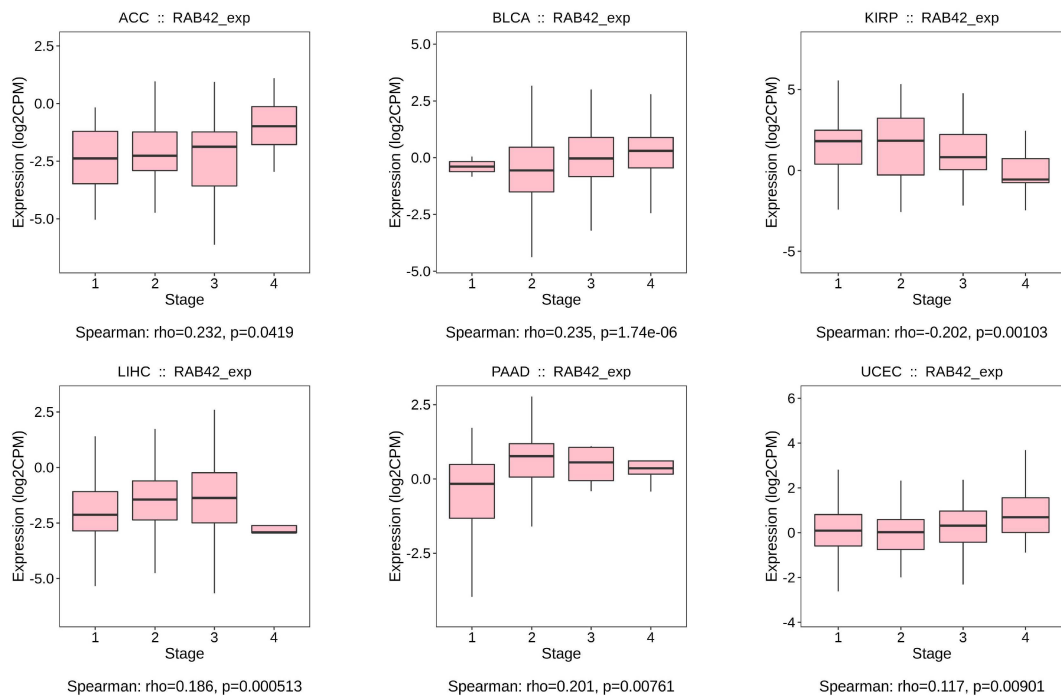**B**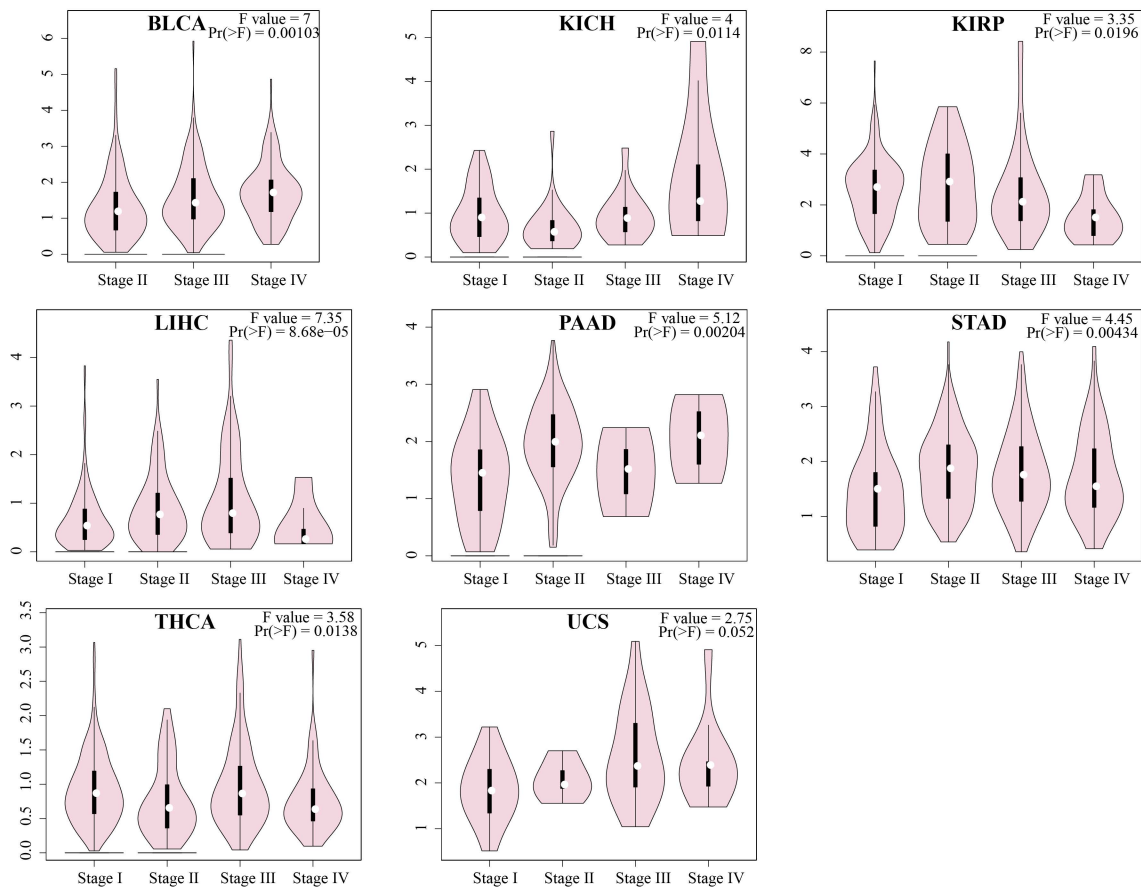

Figure S2: RAB42 expression in different pathological stages. RAB42 expression in different pathological stages using TISIDB database (A) and GEPIA2 database (B).

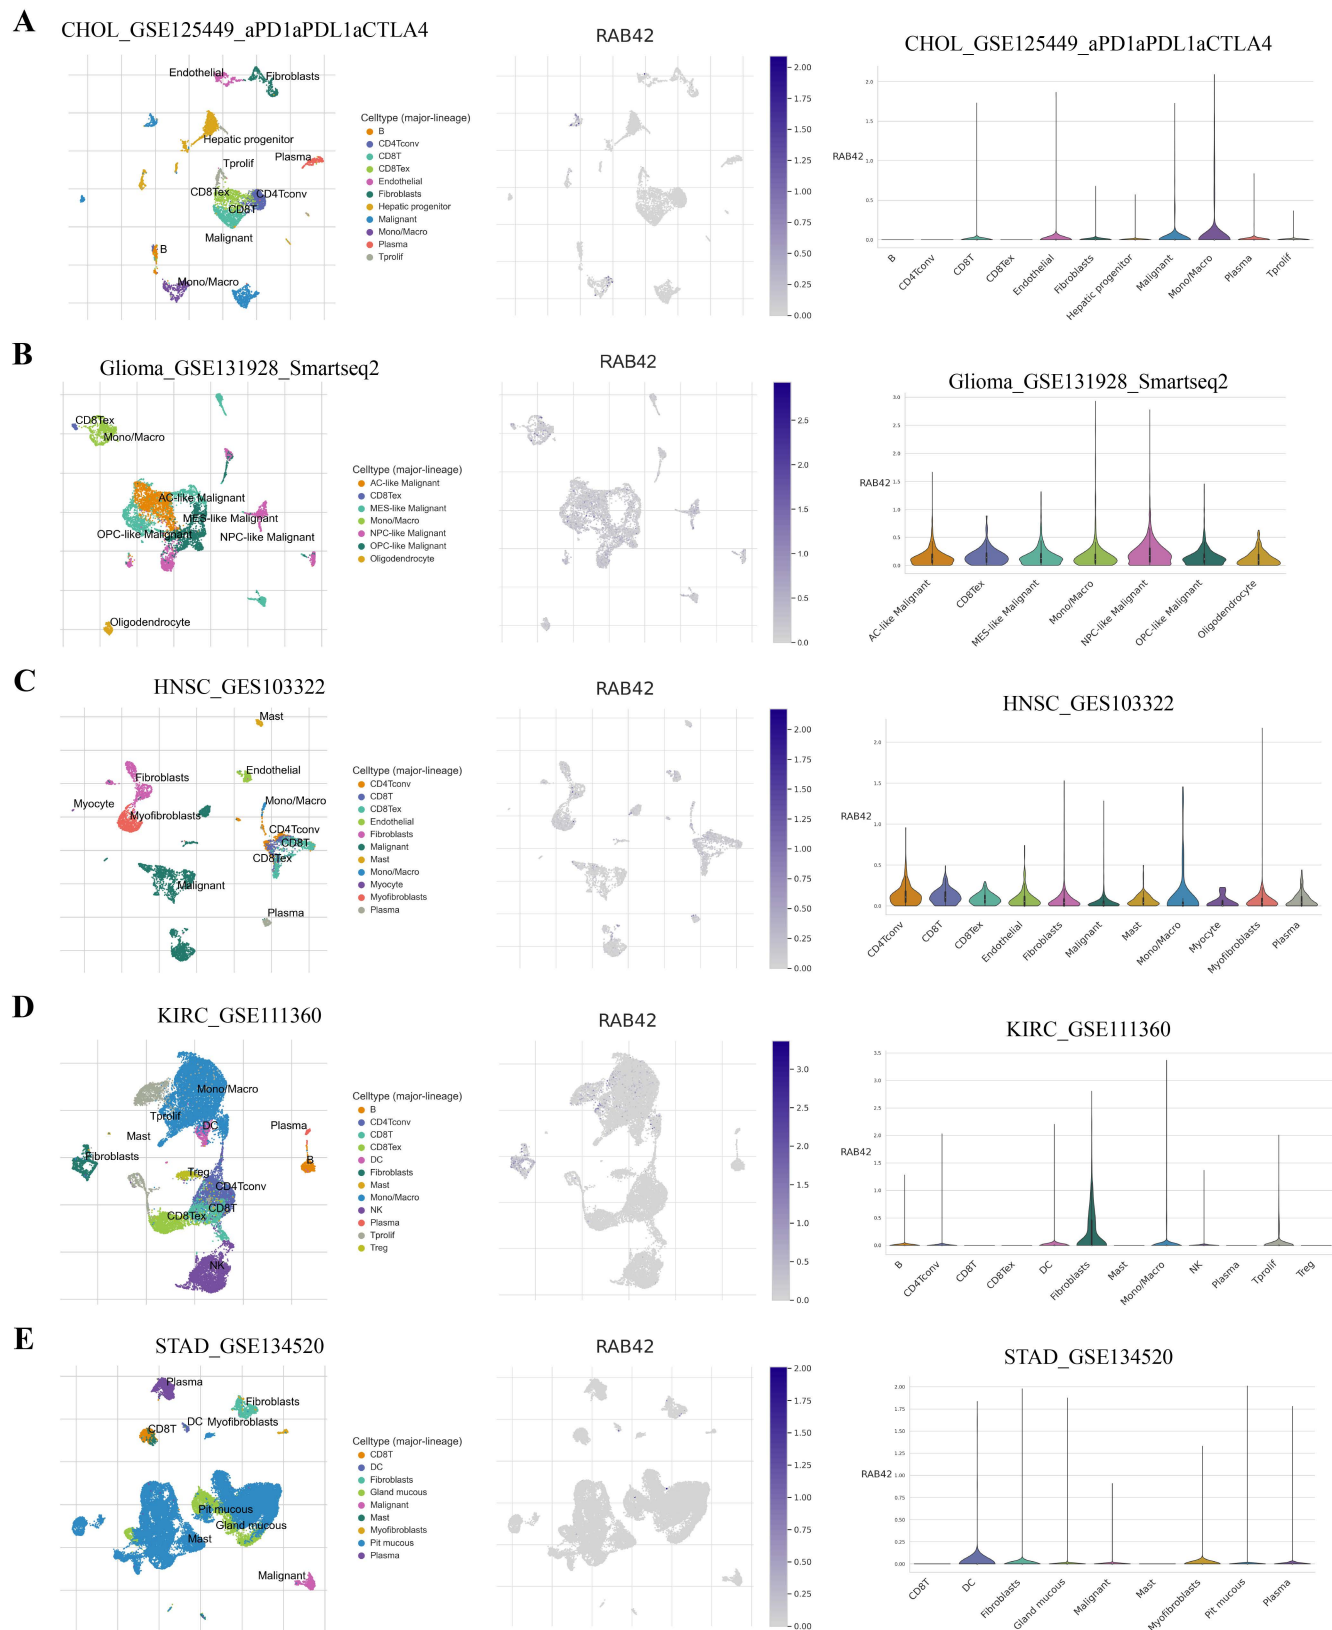

Figure S3: Single-cell sequencing analysis in different cancers. The expression of RAB42 in CHOL (A), Glioma (B), HNSC (C), KIRC (D) and STAD (E).





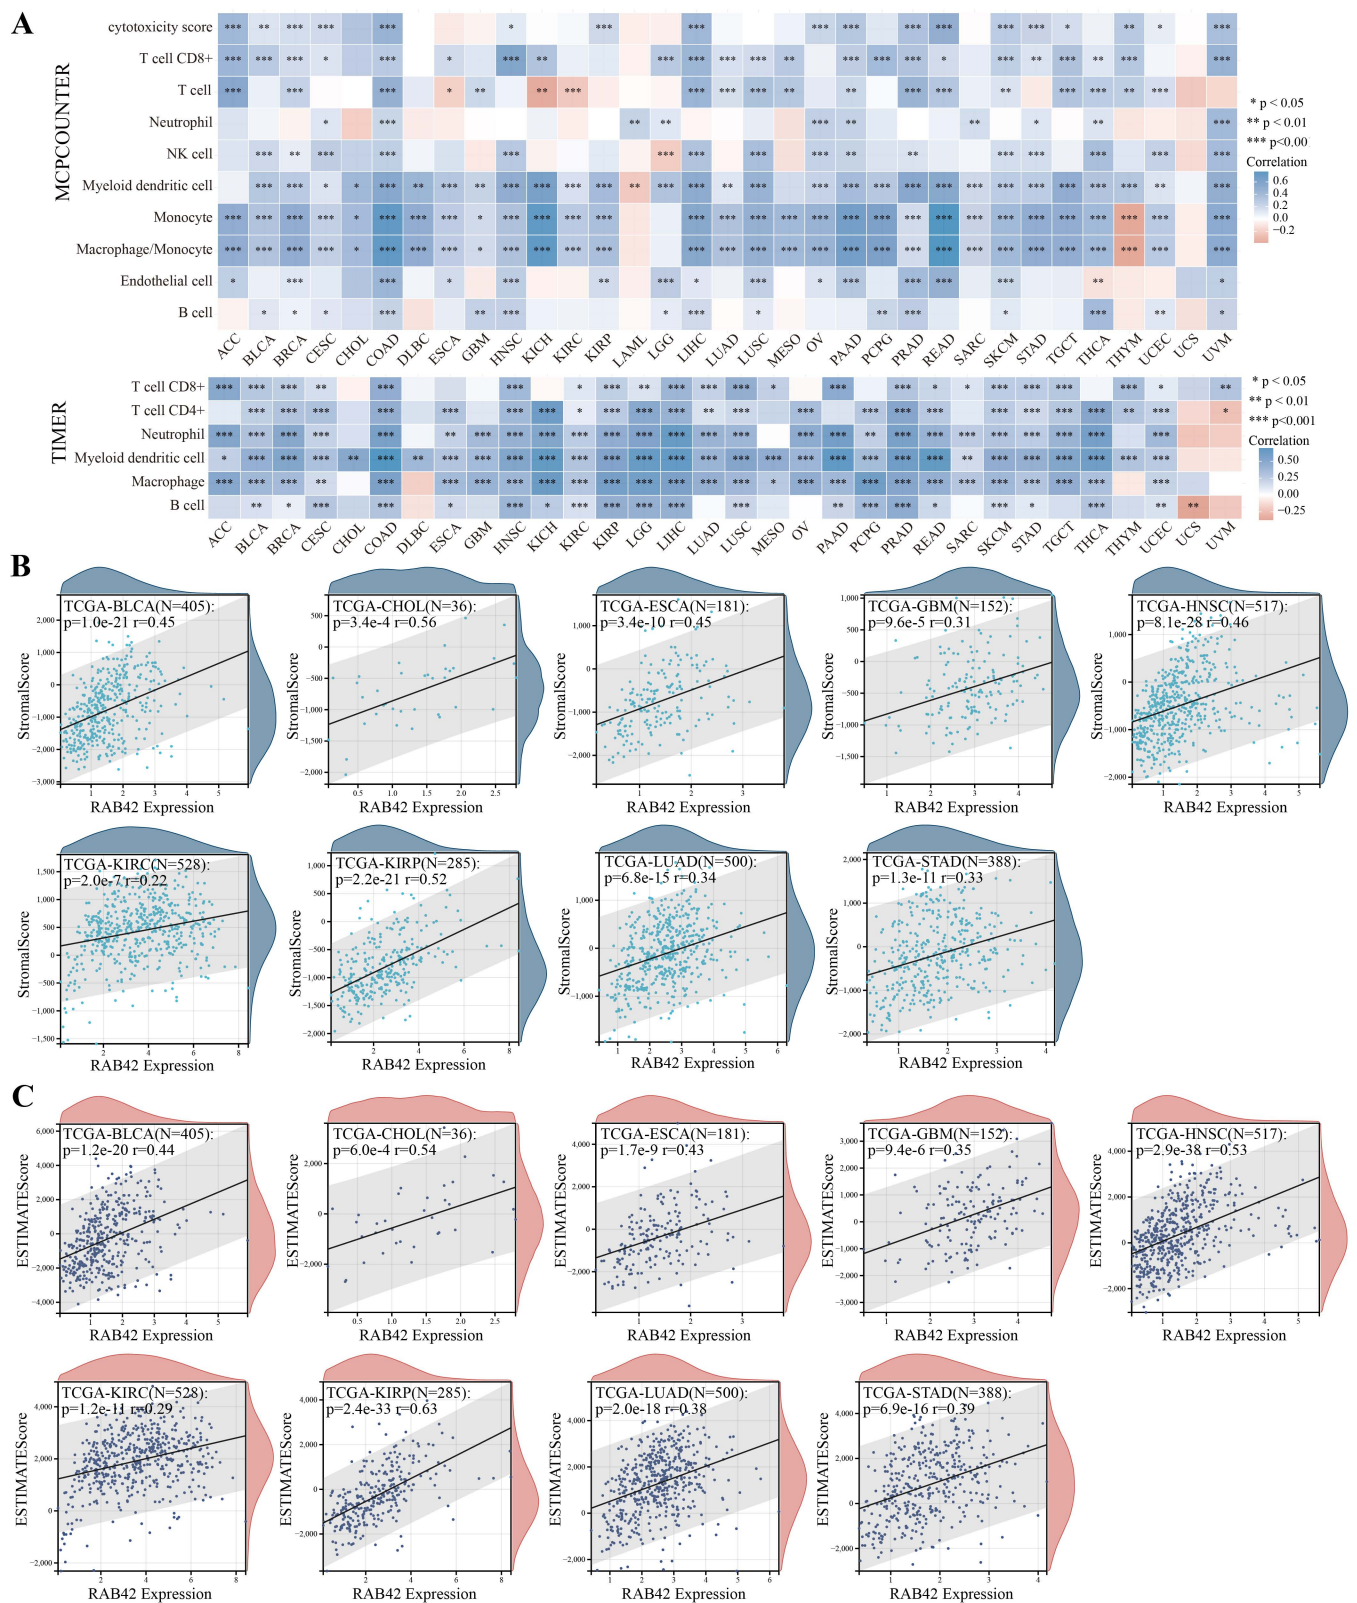

Figure S5: Correlation analysis between RAB42 expression and immune cell infiltration. (A) Spearman correlation between RAB42 expression and immune cell infiltration in pan-cancer. (MCPCOUNTER and TIMER algorithm) (B) Spearman correlation between RAB42 expression and stromal score. (C) Spearman correlation between RAB42 expression and ESTIMATE score. \* $P < 0.05$ , \*\* $P < 0.01$ , \*\*\* $P < 0.001$ .

**A**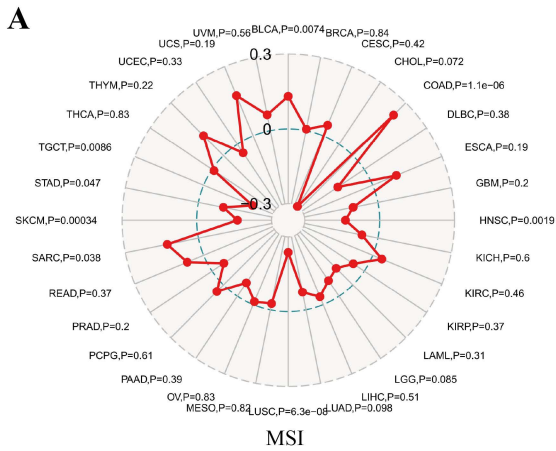**B**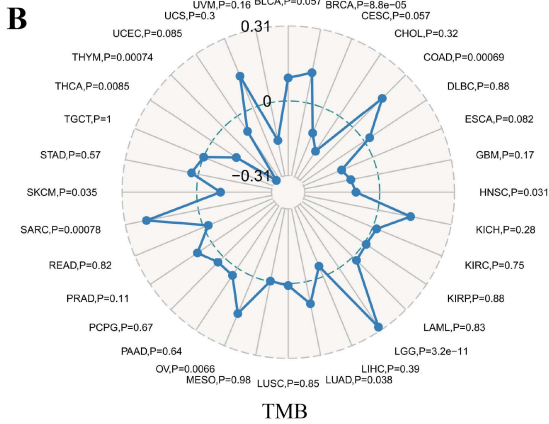**C**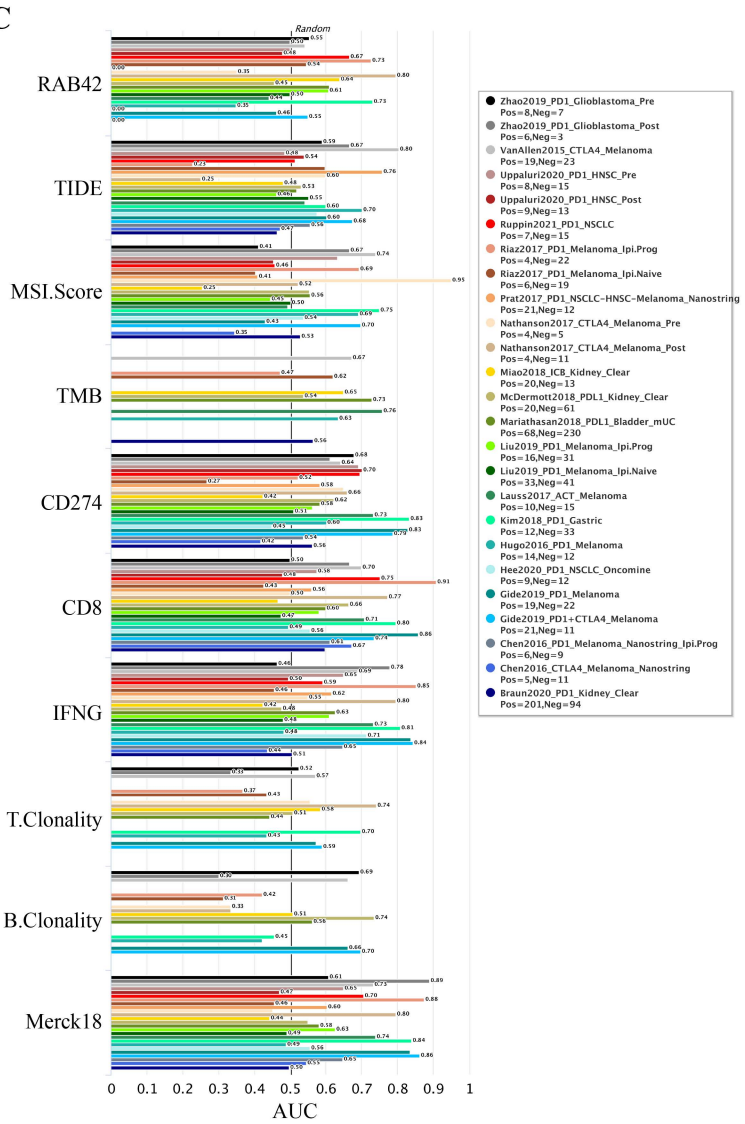**D**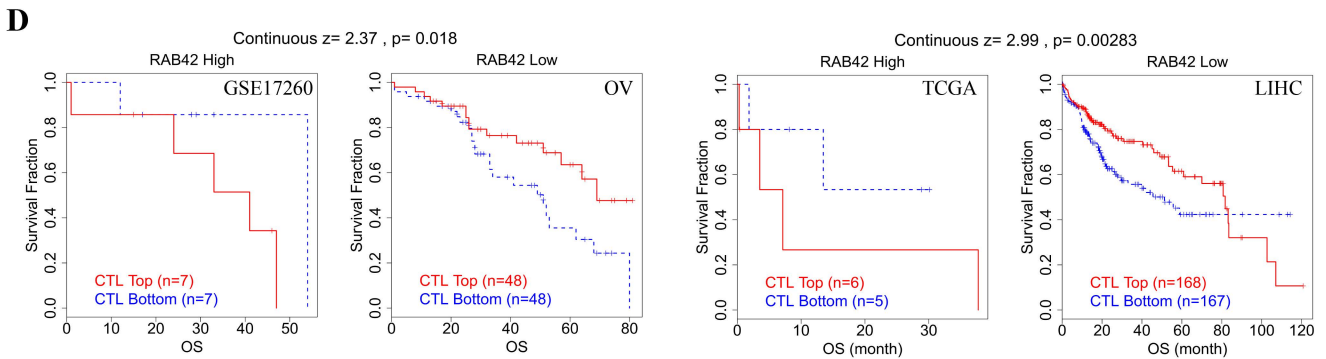

Figure S6: The predictive value of RAB42 for immunotherapy. (A) The correlation between RAB42 expression and MSI. (B) The correlation between RAB42 expression and TMB. (C) The predictive value of biomarkers for immunotherapy. (D) The overall survival of tumor patients with different RAB42 expression and CTL levels.

A

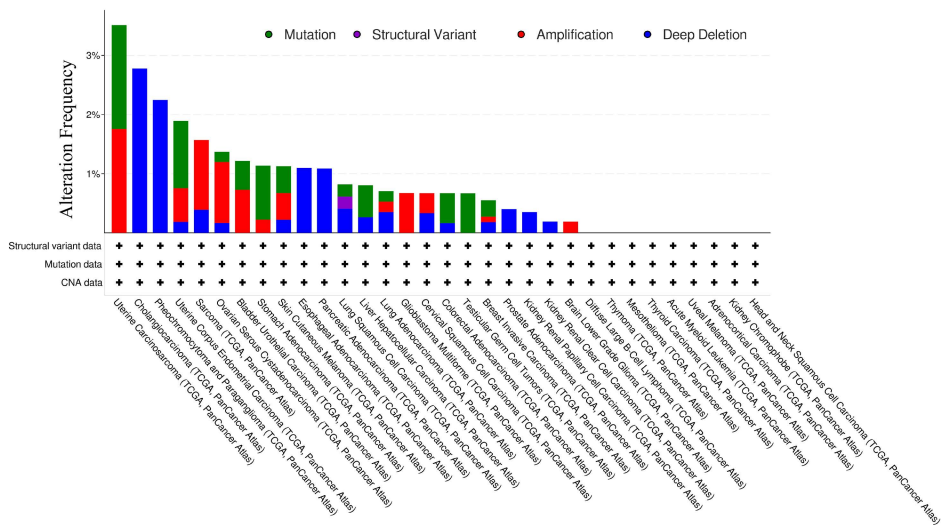

B

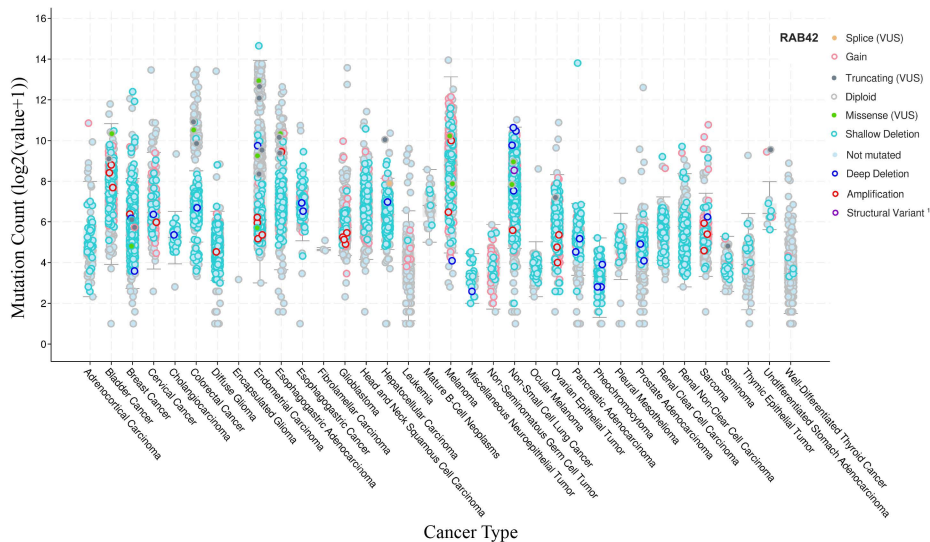

C

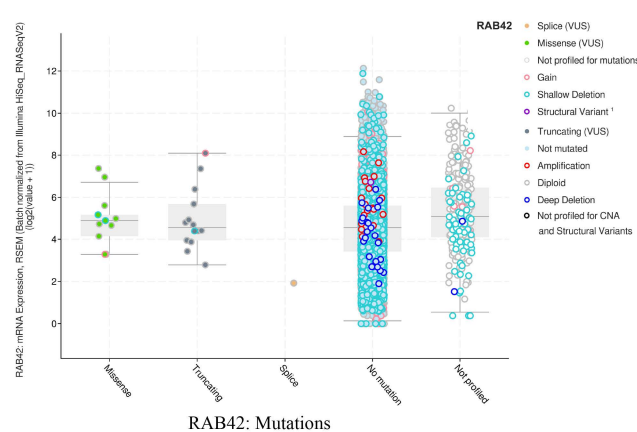

D

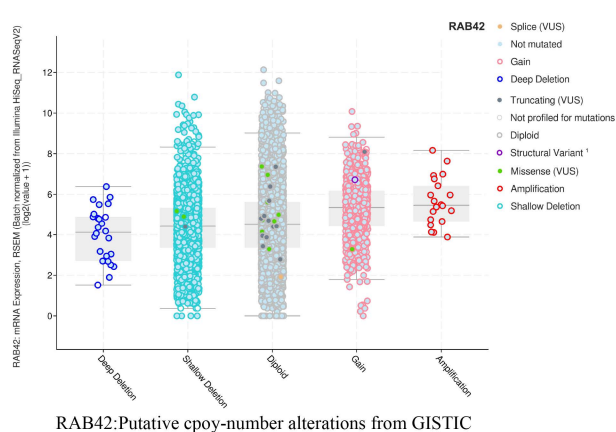

Figure S7: The mutation status analysis for RAB42. (A) The alteration frequency of RAB42 in pan-cancer. (B-D) The mutation counts, mutant types and copy-number alterations of RAB42.

A

| Number | Region     | Obs/Exp | %GC   |
|--------|------------|---------|-------|
| 1      | 464 to 663 | 0.71    | 50.50 |
| 2      | 465 to 664 | 0.70    | 51.00 |
| 3      | 466 to 665 | 0.68    | 51.50 |
| 4      | 467 to 666 | 0.68    | 51.50 |
| 5      | 468 to 667 | 0.67    | 52.00 |
| 6      | 469 to 668 | 0.66    | 52.50 |
| 7      | 470 to 669 | 0.66    | 52.50 |
| 8      | 471 to 670 | 0.64    | 53.00 |
| 9      | 472 to 671 | 0.63    | 53.50 |
| 10     | 473 to 672 | 0.63    | 53.50 |
| 11     | 474 to 673 | 0.62    | 54.00 |
| 12     | 475 to 674 | 0.62    | 54.00 |
| 13     | 476 to 675 | 0.62    | 54.00 |
| 14     | 477 to 676 | 0.68    | 54.50 |
| 15     | 478 to 677 | 0.69    | 54.00 |
| 16     | 479 to 678 | 0.69    | 54.00 |
| 17     | 480 to 679 | 0.62    | 54.00 |
| 18     | 481 to 680 | 0.64    | 53.50 |
| 19     | 482 to 681 | 0.64    | 53.50 |
| 20     | 483 to 682 | 0.63    | 54.00 |
| 21     | 484 to 683 | 0.64    | 53.50 |
| 22     | 485 to 684 | 0.63    | 54.00 |
| 23     | 486 to 685 | 0.64    | 53.50 |
| 24     | 487 to 686 | 0.63    | 54.00 |

# B

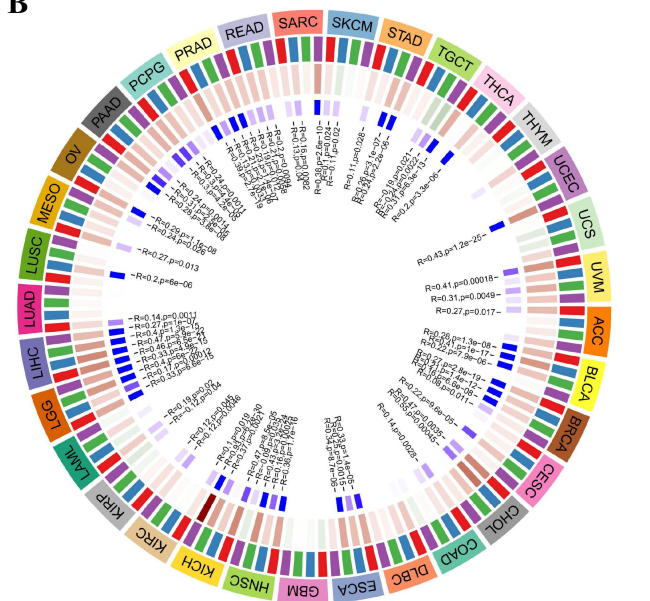

C

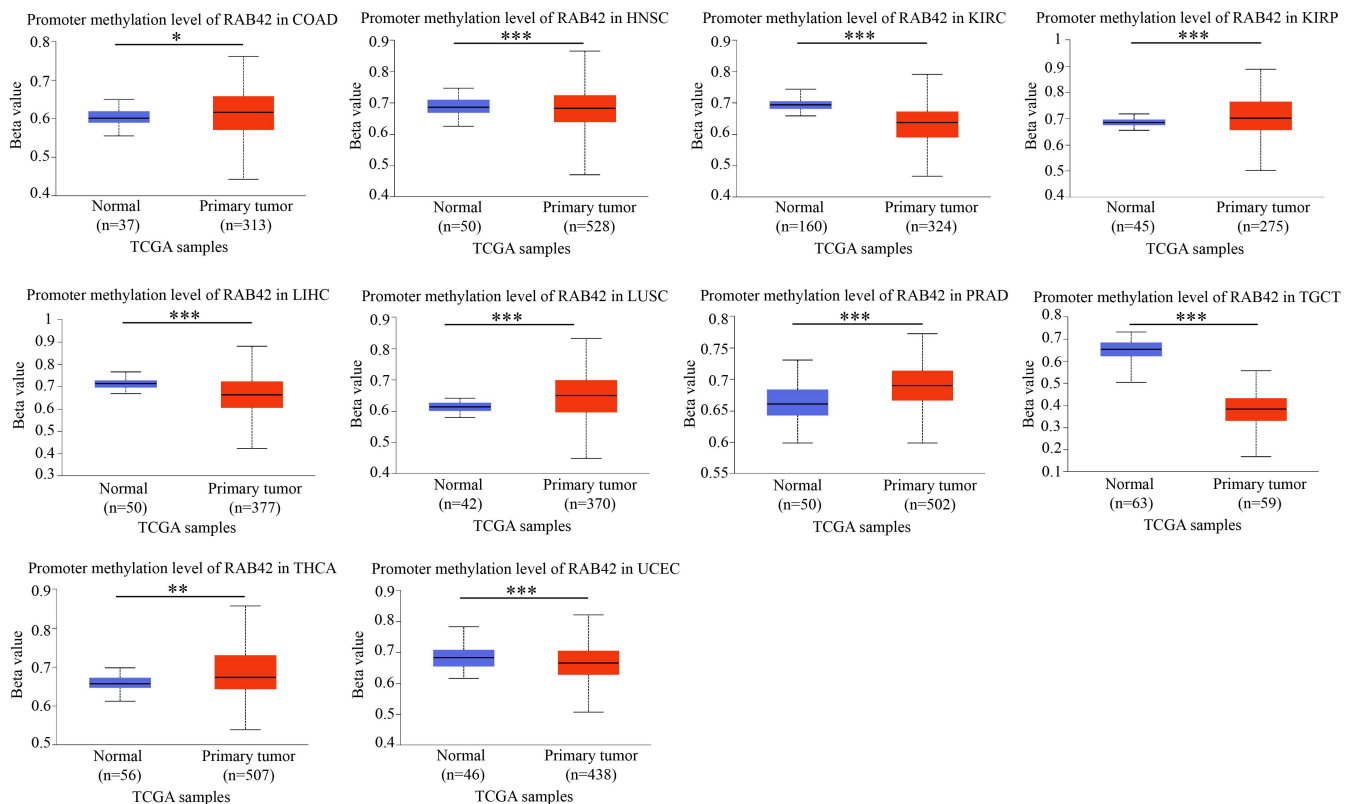

Figure S8: The correlation between DNA methylation and RAB42 expression. (A) CpG islands in RAB42 promoter region. (B) The correlation between RAB42 expression and DNA methyltransferases. Red box: DNMT1; blue box: DNMT2; green box: DNMT3A; purple box: DNMT3B. (C) Promoter methylation levels of RAB42. \*P < 0.05, \*\*P < 0.01, \*\*\*P < 0.001.





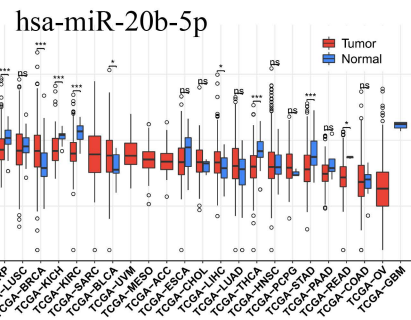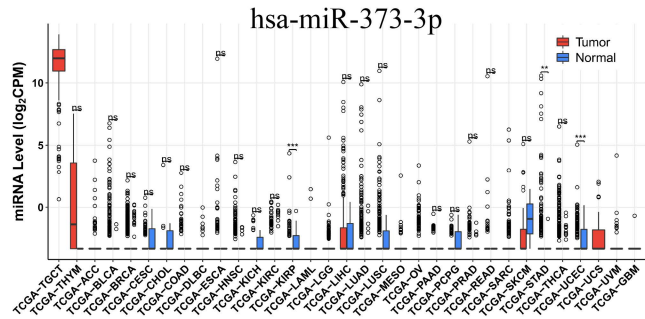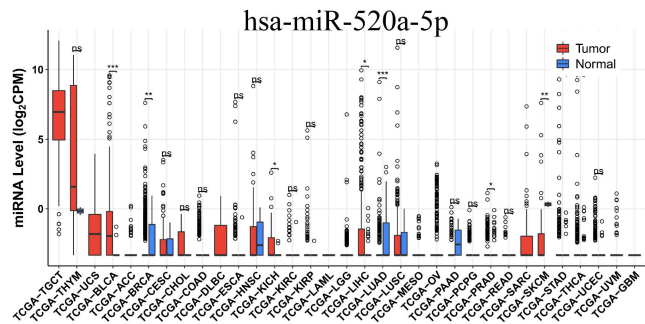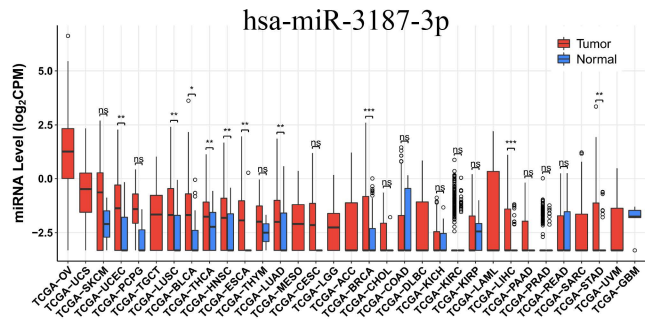

Figure S10: The expression of 9 miRNAs in pan-cancer.

**TABLE S1** List of abbreviations.

| Abbreviations | Full name                                                        |
|---------------|------------------------------------------------------------------|
| ACC           | Adrenocortical carcinoma                                         |
| BLCA          | Bladder Urothelial Carcinoma                                     |
| BRCA          | Breast invasive carcinoma                                        |
| CESC          | Cervical squamous cell carcinoma and endocervical adenocarcinoma |
| CHOL          | Cholangiocarcinoma                                               |
| COAD          | Colon adenocarcinoma                                             |
| COADREAD      | Colon adenocarcinoma/Rectum adenocarcinoma Esophageal carcinoma  |
| DLBC          | Lymphoid Neoplasm Diffuse Large B-cell Lymphoma                  |
| ESCA          | Esophageal carcinoma                                             |
| GBM           | Glioblastoma multiforme                                          |
| GBMLGG        | Glioma                                                           |
| HNSC          | Head and Neck squamous cell carcinoma                            |
| KICH          | Kidney Chromophobe                                               |
| KIPAN         | Pan-kidney cohort (KICH+KIRC+KIRP)                               |
| KIRC          | Kidney renal clear cell carcinoma                                |
| KIRP          | Kidney renal papillary cell carcinoma                            |
| LAML          | Acute Myeloid Leukemia                                           |
| LGG           | Brain Lower Grade Glioma                                         |
| LIHC          | Liver hepatocellular carcinoma                                   |
| LUAD          | Lung adenocarcinoma                                              |
| LUSC          | Lung squamous cell carcinoma                                     |
| MESO          | Mesothelioma                                                     |
| OV            | Ovarian serous cystadenocarcinoma                                |
| PAAD          | Pancreatic adenocarcinoma                                        |
| PCPG          | Pheochromocytoma and Paraganglioma                               |
| PRAD          | Prostate adenocarcinoma                                          |
| READ          | Rectum adenocarcinoma                                            |
| SARC          | Sarcoma                                                          |
| SKCM          | Skin Cutaneous Melanoma                                          |
| STAD          | Stomach adenocarcinoma                                           |
| STES          | Stomach and Esophageal carcinoma                                 |
| TGCT          | Testicular Germ Cell Tumors                                      |
| THCA          | Thyroid carcinoma                                                |
| THYM          | Thymoma                                                          |
| UCEC          | Uterine Corpus Endometrial Carcinoma                             |
| UCS           | Uterine Carcinosarcoma                                           |
| UVM           | Uveal Melanoma                                                   |
| RAB42         | member of RAS oncogene family                                    |
| OS            | overall survival                                                 |
| DSS           | disease-specific survival                                        |
| DFI           | disease-free interval                                            |
| PFI           | progression-free interval                                        |
| PPI           | PPI                                                              |
| GO            | Gene Ontology                                                    |
| KEGG          | Kyoto Encyclopedia of Genes and Genomes                          |

|                  |                                                      |
|------------------|------------------------------------------------------|
| BP               | Biological process                                   |
| CC               | Cellular component                                   |
| MF               | Molecular function                                   |
| GSEA             | Gene set enrichment analysis                         |
| IL2              | Interleukin-2                                        |
| STAT5            | signal transducers and activators of transcription 5 |
| TNFA             | tumor necrosis factor alpha                          |
| NFKB             | Nuclear Factor kappa-B                               |
| PI3K             | phosphatidylinositol-3-kinase                        |
| PD-L1            | programmed death ligand 1                            |
| PD1              | prephenate dehydratase 1                             |
| CTLA4            | cytotoxic T-lymphocyte associated protein 4          |
| TMB              | tumor mutation burden                                |
| MSI              | microsatellite instability                           |
| MSI-H            | microsatellite instability-high                      |
| APC              | APC regulator of WNT signaling pathway               |
| TP53             | tumor protein p53                                    |
| KRAS             | KRAS proto-oncogene                                  |
| PTEN             | phosphatase and tensin homolog                       |
| CTNNB1           | catenin beta 1                                       |
| H3K27ac          | histone 3 lysine 27 acetylation                      |
| BRD4             | bromodomain containing 4                             |
| TCGA             | The Cancer Genome Atlas                              |
| GTE <sub>x</sub> | Genotype-Tissue Expression                           |
| CCLE             | Cancer Cell Line Encyclopedia                        |

**TABLE S2** Correlation of RAB42 expression with IC50 of drugs.

| Gene  | Drug                | Correlation        | Pvalue                |
|-------|---------------------|--------------------|-----------------------|
| RAB42 | PF-03758309         | -0.511408047037293 | 0.0000408533542768594 |
| RAB42 | TYROTHRICIN         | -0.481014306343894 | 0.000132323538783043  |
| RAB42 | geldanamycin analog | -0.462869469486491 | 0.000253671202496619  |
| RAB42 | Barasertib          | -0.457778387749244 | 0.000302541648685769  |
| RAB42 | TAK-901             | -0.427301152673435 | 0.000821730302376078  |
| RAB42 | Paclitaxel          | -0.414744843543658 | 0.00120805305698054   |
| RAB42 | Volasertib          | -0.410790383990264 | 0.00135980716448898   |
| RAB42 | Vinblastine         | -0.404707482063116 | 0.001626770085215     |
| RAB42 | ARQ-621             | -0.404167274269667 | 0.00165260840525535   |
| RAB42 | Eribulin mesilate   | -0.401203921484764 | 0.00180099043162863   |
| RAB42 | PKI-587             | -0.3994284060871   | 0.00189549668658586   |
| RAB42 | EMD-534085          | -0.396078132531717 | 0.00208596557996328   |
| RAB42 | SGI-1027            | -0.375377429667674 | 0.00368955422794006   |
| RAB42 | NMS-1286937         | -0.369915106593752 | 0.00426319889798629   |
| RAB42 | Pipamperone         | -0.368124258140446 | 0.00446768741679944   |
| RAB42 | BMS-387032          | -0.365589542792897 | 0.00477188027234197   |
| RAB42 | AT-7519             | -0.363791071576029 | 0.00499863334062476   |
| RAB42 | ONX-0914            | -0.354277282089839 | 0.00636287091802706   |
| RAB42 | DOLASTATIN 10       | -0.348893933204888 | 0.00727100516756416   |



|       |                      |                    |                     |
|-------|----------------------|--------------------|---------------------|
| RAB42 | Actinomycin D        | -0.345853294323162 | 0.00783237005926359 |
| RAB42 | Sepantronium bromide | -0.335879702338896 | 0.00994721917955311 |
| RAB42 | Des-fluoro-TAK-960   | -0.335027358477202 | 0.0101489983531656  |
| RAB42 | TAK Plk inhibitor    | -0.332388616564902 | 0.0107963186283264  |
| RAB42 | Vinorelbine          | -0.329909222008758 | 0.0114367779477434  |
| RAB42 | GSK-461364           | -0.325264200680427 | 0.0127252798228941  |
| RAB42 | SNX-5422             | -0.30987188333679  | 0.0179266389945665  |
| RAB42 | Homoharringtonine    | -0.30871731052872  | 0.0183810400731057  |
| RAB42 | Dinaciclib           | -0.303877169791182 | 0.0203942113737487  |
| RAB42 | VINORELBINE          | -0.301430936205484 | 0.0214809116030088  |
| RAB42 | Crizotinib           | -0.295999551624129 | 0.0240700817316222  |
| RAB42 | TAK-960 analog       | -0.295137473431892 | 0.0245043140008297  |
| RAB42 | SB-590885            | -0.291428347102687 | 0.0264486925691044  |
| RAB42 | Depsipeptide         | -0.290598227675576 | 0.0269011696272752  |
| RAB42 | Bafetinib            | -0.284386445824753 | 0.030497720357092   |
| RAB42 | A-1210477            | -0.279509650480056 | 0.0335953387246565  |
| RAB42 | MLN-2480             | -0.279195626611842 | 0.0338034575032783  |
| RAB42 | TAK-632              | -0.275259618578387 | 0.0365042539403081  |
| RAB42 | JNJ-47117096         | -0.271459578272118 | 0.0392790991299163  |
| RAB42 | Carfilzomib          | -0.271247228208099 | 0.0394391636727679  |
| RAB42 | ICG-001              | -0.270595198317755 | 0.0399340183966344  |
| RAB42 | PF-4942847           | -0.270159069369475 | 0.0402678678844733  |
| RAB42 | Litronesib           | -0.267988645343624 | 0.041963711284088   |
| RAB42 | Danuserib            | -0.265183599526917 | 0.0442420793570055  |
| RAB42 | BI-2536              | -0.263789199064654 | 0.0454119028197045  |
| RAB42 | BGB-283              | -0.261414574379898 | 0.0474623827826353  |
| RAB42 | VX-944               | -0.260763786908769 | 0.0480373685279272  |
| RAB42 | AMG-900              | -0.260271586372535 | 0.0484760103091654  |
| RAB42 | Tamoxifen            | -0.259660724761104 | 0.0490249463454888  |
| RAB42 | Benzimate            | -0.259610884313699 | 0.0490699573002912  |

**TABLE S3** Docking score of three target drugs.

| Name       | Pose | Grid_Score | Grid_vdw_energy | Grid_es_energy | Internal_energy_repulsive |
|------------|------|------------|-----------------|----------------|---------------------------|
| AT-7519    | 1    | -57.760082 | -55.330215      | -2.429866      | 14.975024                 |
| BI-2536    | 1    | -69.685188 | -70.835358      | 1.150170       | 32.405167                 |
| BI-2536    | 2    | -65.360077 | -64.647903      | -0.712177      | 13.895164                 |
| Dinaciclib | 1    | -63.034576 | -57.326336      | -5.708241      | 10.130095                 |
| Dinaciclib | 2    | -61.944305 | -54.145233      | -7.799074      | 9.552348                  |

**Table S4 RAB42-related lncRNAs**

| Gene Name    | High expression in cancers    | Positive correlation in cancers |
|--------------|-------------------------------|---------------------------------|
| AL031428.1   | KIRC, STAD                    | ESCA, PCPG, LIHC                |
| HAGLR        | LIHC, CHOL, THCA, HNSC, ESCA, | CHOL, LAML, ACC, LIHC, ESCA     |
| FGD5-AS1     | CHOL                          | HNSC, CHOL, PRAD, LUSC, LIHC    |
| CKMT2-AS1    | LIHC                          | HNSC, THYM, BLCA                |
| EPB41L4A-AS1 | CHOL, KIRC                    | ACC, HNSC                       |

|                 |                               |                              |
|-----------------|-------------------------------|------------------------------|
| AC021078.1      | CHOL, KIRC, LIHC              | LIHC, PAAD, LGG, THCA        |
| ERICD           | CHOL, LIHC, COAD, HNSC        | HNSC, ESCA, LIHC, THYM, STAD |
| AL158206.1      | THCA                          | LAML, UVM, ESCA, LIHC, THCA  |
| H19             | COAD, STAD                    | PAAD, LGG, THCA, LIHC, STAD  |
| NEAT1           | KIRC, PRAD, LIHC, KICH        | LGG, TGCT, PAAD, UCEC, LIHC  |
| MALAT1          | COAD, KIRC, CHOL, LIHC, PRAD, | LIHC, ESCA, PAAD, PRAD       |
| AC024940.6      | CHOL, STAD, COAD, BLCA, KICH  | LIHC, ESCA                   |
| HOTAIR          | LUSC, STAD, LUAD, HNSC, COAD  | LGG, DLBC, LIHC, LAML, PRAD  |
| AL161772.1      | CHOL, BLCA, LIHC, ESCA, COAD  | UVM, LIHC, SARC, BRCA        |
| AL137782.1      | COAD                          | CHOL, THYM, THCA, PCPG, LIHC |
| AC015871.3      | CHOL, LIHC,                   | ESCA, HNSC, LIHC, TGCT, CESC |
| AC087477.2      | CHOL, KIRP                    | UVM, HNSC, LGG, PAAD, PRAD   |
| ARHGAP27P1-BPTF | CHOL, KIRC, LIHC, KIRP, BLCA  | KICH, CHOL, LIHC, UVM, THCA  |
| P1-KPNA2P3      |                               |                              |
| SNHG16          | COAD, CHOL                    | CHOL, ACC, LIHC, KIRC, PAAD  |
| AC021092.1      | CHOL, LUSC, LIHC, BLCA, LUAD  | HNSC, LIHC, ESCA, LGG, CESC  |
| AC243964.3      | STAD, CHOL, LIHC              | LAML, BLCA, BRCA, CESC, UCEC |
| AC005261.1      | CHOL, LIHC, COAD              | LIHC, LGG                    |
| NORAD           | CHOL                          | UVM, LIHC, ESCA, PRAD, HNSC  |
| XIST            | KIRC                          | TGCT, LIHC                   |
| NPPA-AS1        | KIRC, LIHC, STAD, HNSC, PRAD  | KICH, LIHC, LGG, SARC, KIRP  |
| MIR17HG         | COAD, STAD, LIHC, KIRC, HNSC  | ACC, ESCA, LAML, THCA, UCEC  |
| AL049840.4      | CHOL, LIHC, KIRC              | UVM, LIHC, TGCT, LGG, THCA   |
| AC125257.1      | CHOL, STAD, ESCA, LIHC        | UVM, KICH, HNSC, LIHC, TGCT  |
| GAS5            | CHOL, LIHC, KIRC, COAD, LUAD  | ACC, KICH, LIHC              |
| AL049543.1      | CHOL, BLCA, STAD, LUSC, LIHC  | THYM, LIHC, LAML, STAD, BLCA |
| HCP5            | CHOL, HNSC, LIHC, KIRC, KICH  | TGCT, UVM, LGG, PAAD, THCA   |
| ZFAS1           | CHOL, COAD, KIRC, LIHC, KIRP  | ACC, KICH, LIHC, KIRC        |
| MIRLET7BHG      | CHOL, COAD, KIRC, LIHC, BLCA  | UVM, LIHC, THCA              |
| U62317.3        | HNSC, KIRC, ESCA, CHOL, KIRP  | KICH, UVM, LIHC, ACC, TGCT   |
| LINC01184       | CHOL                          | THYM, HNSC, TGCT, LIHC       |
| EBLN3P          | CHOL                          | PCPG, HNSC, PRAD, BLCA, LIHC |
| MIR497HG        | KIRC                          | KICH, HNSC, ESCA, UVM, LUSC  |
| AC092295.2      | CHOL, LIHC                    | HNSC, PCPG, LUAD, LIHC, TGCT |
| AL356488.2      | COAD, BRCA                    | UCS, ESCA, HNSC, BLCA, LUSC  |
| AC234582.1      | CHOL, LIHC                    | KICH, UVM, HNSC, PRAD, THCA  |
| AC069281.2      | CHOL, KICH, ESCA, KIRC        | ESCA, HNSC, TGCT, LIHC       |
| KCNQ1OT1        | CHOL, LUAD, STAD, CHOL, KIRC  | LIHC, ESCA, HNSC, LAML, PAAD |
| AC016876.2      | KIRC, CHOL, KIRP              | KICH, LIHC, KIRC, STAD, BRCA |
| AC073548.1      | KIRC, CHOL, LIHC, HNSC, KICH  | THYM, TGCT, LIHC, UCEC       |
| AC010327.5      | CHOL, LIHC                    | LIHC, HNSC, PRAD, THYM, TGCT |
| MIR663AHG       | LIHC, STAD, HNSC, BRCA        | KICH, CHOL, LIHC, THYM, UVM  |
